# Supplementary material
Source: PubMed Central journal article supplement (PMC1986620)
Supplement: pnas_0706449104_1.pdf [file pnas_0706449104_1.pdf]

**v1**

|                    |            |            |            |            |            |            |            |            |
|--------------------|------------|------------|------------|------------|------------|------------|------------|------------|
| EIAV <sub>D9</sub> | MVSIAFYGGI | PGGISTPITQ | QSEKSKCEEN | TMFQPYCYNN | DSKNSMAESK | EARDQEMNLK | EESKEEKRRN | DWWKIGMFLI |
| EV0                | .....      | .....      | .....      | .....      | .....      | .....      | .....      | .....      |
| EV6                | .....      | .....      | .....      | .....      | .....      | .....      | .....      | .....      |
| EV13               | .....      | .....      | .....      | .....      | .....      | .....      | .....      | .....      |

**v2**

|                    |            |            |            |            |            |            |            |            |
|--------------------|------------|------------|------------|------------|------------|------------|------------|------------|
| EIAV <sub>D9</sub> | CLAGTTGGIL | WWYEGLPQQH | YIGLVAIGGR | LNGSGQSNAI | ECWGSFPGCR | PFQNYFSYET | NRSMHMDNNT | ATLLEAYHRE |
| EV0                | .....      | .....      | .....      | .....      | .....      | .....      | .....      | .....      |
| EV6                | .....      | .....      | .....      | .....      | .....      | .....      | .....      | .....      |
| EV13               | .....      | .....      | .....      | .....      | .....      | .....      | .....      | .....      |

**\*v3**

**\*v4**

|                    |            |            |            |          |            |            |            |           |
|--------------------|------------|------------|------------|----------|------------|------------|------------|-----------|
| EIAV <sub>D9</sub> | ITFIYKSSCT | DSDHCQEYQC | KKVNLSNDDS | SN-----P | VRVEDVMNTT | EYWGFKWLEC | NQTFNFKTIL | VPENEMVNI |
| EV0                | .....      | .....      | .....      | .....    | .....      | .....      | .....      | .....     |
| EV6                | .....      | .....      | .....      | .....    | .....      | .....      | .....      | .....     |
| EV13               | .....      | .....      | .....      | .....    | .....      | .....      | .....      | .....     |

**v5**

**v6**

|                    |            |            |            |            |            |             |            |            |
|--------------------|------------|------------|------------|------------|------------|-------------|------------|------------|
| EIAV <sub>D9</sub> | DTDTWIPKGC | NETWARVKRC | PIDILYGIHP | IRLCVQPPFF | LVQEKGIANT | -SRIGNCGPTI | FLGVLEDNKG | VVRGNYTACN |
| EV0                | .....      | .....      | .....      | .....      | .....      | .....       | .....      | .....      |
| EV6                | .....      | .....      | .....      | .....      | .....      | .....       | .....      | .....      |
| EV13               | .....      | .....      | .....      | .....      | .....      | .....       | .....      | .....      |

**v7**

|                    |            |            |            |            |            |          |         |                |
|--------------------|------------|------------|------------|------------|------------|----------|---------|----------------|
| EIAV <sub>D9</sub> | VSRLKINRKD | YTGIVQVPIF | YTCNFTNITS | CNNEPIISVI | MYETNOVQYL | LCNNNSN- | -YNCVVQ | SFG VIGQAHLELP |
| EV0                | .....      | .....      | .....      | .....      | .....      | .....    | .....   | .....          |
| EV6                | .....      | .....      | .....      | .....      | .....      | .....    | .....   | .....          |
| EV13               | .....      | .....      | .....      | .....      | .....      | .....    | .....   | .....          |

**v8**

|                    |            |            |           |            |            |       |
|--------------------|------------|------------|-----------|------------|------------|-------|
| EIAV <sub>D9</sub> | RPNKRIRNQS | FNQYNCSINN | KTELETWKL | KTSGITPLPI | SSEANTGLIR | HKR   |
| EV0                | .....      | .....      | .....     | .....      | .....      | ..... |
| EV6                | .....      | .....      | .....     | .....      | .....      | ..... |
| EV13               | .....      | .....      | .....     | .....      | .....      | ..... |
